# Supplementary material for: An observational study of once-weekly carfilzomib in patients with multiple myeloma in Japan (Weekly-CAR study)
Source: PubMed Central journal article supplement — Future Oncol. 2024 Feb 29;20(17):1191–205. doi: 10.2217/fon-2023-0834 (PMC11318723; doi:10.2217/fon-2023-0834), 2024-02-29
Supplement: IFON_A_2337541_SM0001.pdf [file IFON_A_2337541_SM0001.pdf]

**Supplementary Table 1.** Factors associated with response rate

| Patient characteristics                                        | n <sup>a</sup> | ORR, n(%) | p-value                 |
|----------------------------------------------------------------|----------------|-----------|-------------------------|
| <b>Sex</b>                                                     |                |           |                         |
| Male                                                           | 51             | 40 (78.4) | p = 0.0131 <sup>†</sup> |
| Female                                                         | 53             | 29 (54.7) |                         |
| <b>Age</b>                                                     |                |           |                         |
| < 65                                                           | 27             | 23 (85.2) | p = 0.0182 <sup>†</sup> |
| ≥ 65                                                           | 77             | 46 (59.7) |                         |
| < 75                                                           | 78             | 54 (69.2) | p = 0.3397 <sup>†</sup> |
| ≥ 75                                                           | 26             | 15 (57.7) |                         |
| <b>ECOG-PS</b>                                                 |                |           |                         |
| 0–1                                                            | 64             | 41 (64.1) | p = 0.7378 <sup>†</sup> |
| 2–4                                                            | 11             | 8 (72.7)  |                         |
| Unknown                                                        | 29             | 20 (69.0) |                         |
| <b>Complications</b>                                           |                |           |                         |
| No                                                             | 56             | 38 (67.9) | p = 0.8356 <sup>†</sup> |
| Yes                                                            | 48             | 31 (64.6) |                         |
| <b>Cytogenetics</b>                                            |                |           |                         |
| <b>del(17p)</b>                                                |                |           |                         |
| No                                                             | 48             | 31 (64.6) | p = 0.5296 <sup>†</sup> |
| Yes                                                            | 13             | 7 (53.8)  |                         |
| Unknown                                                        | 43             | 31 (72.1) |                         |
| <b>t(4;14)</b>                                                 |                |           |                         |
| No                                                             | 44             | 30 (68.2) | p = 1.0000 <sup>†</sup> |
| Yes                                                            | 18             | 12 (66.7) |                         |
| Unknown                                                        | 42             | 27 (64.3) |                         |
| <b>t(11;14)</b>                                                |                |           |                         |
| No                                                             | 27             | 16 (59.3) | p = 0.5460 <sup>†</sup> |
| Yes                                                            | 20             | 14 (70.0) |                         |
| Unknown                                                        | 57             | 39 (68.4) |                         |
| <b>t(14;16)</b>                                                |                |           |                         |
| No                                                             | 52             | 34 (65.4) | p = 0.7068 <sup>†</sup> |
| Yes                                                            | 8              | 6 (75.0)  |                         |
| Unknown                                                        | 44             | 29 (65.9) |                         |
| <b>High risk [at least one of del(17p), t(4;14), t(14;16)]</b> |                |           |                         |
| No                                                             | 31             | 20 (64.5) | p = 0.7912 <sup>†</sup> |

|                                                |    |           |                          |
|------------------------------------------------|----|-----------|--------------------------|
| Yes                                            | 33 | 23 (69.7) |                          |
| Unknown                                        | 40 | 26 (65.0) |                          |
| Number of prior treatments                     |    |           |                          |
| 1                                              | 21 | 19 (90.5) |                          |
| 2–3                                            | 34 | 22 (64.7) | p = 0.0103 <sup>††</sup> |
| ≥ 4                                            | 49 | 28 (57.1) |                          |
| Prior bortezomib treatment                     |    |           |                          |
| No                                             | 10 | 7 (70.0)  |                          |
| Yes                                            | 94 | 62 (66.0) | p = 1.0000 <sup>†</sup>  |
| Refractory to bortezomib                       |    |           |                          |
| No                                             | 47 | 35 (74.5) |                          |
| Yes                                            | 45 | 25 (55.6) | p = 0.0797 <sup>†</sup>  |
| Unknown                                        | 12 | 9 (75.0)  |                          |
| Prior lenalidomide treatment                   |    |           |                          |
| No                                             | 13 | 8 (61.5)  |                          |
| Yes                                            | 91 | 61 (67.0) | p = 0.7574 <sup>†</sup>  |
| Refractory to lenalidomide                     |    |           |                          |
| No                                             | 34 | 25 (73.5) |                          |
| Yes                                            | 55 | 34 (61.8) | p = 0.3564 <sup>†</sup>  |
| Unknown                                        | 15 | 10 (66.7) |                          |
| Prior bortezomib and lenalidomide treatment    |    |           |                          |
| No                                             | 22 | 14 (63.6) |                          |
| Yes                                            | 82 | 55 (67.1) | p = 0.8022 <sup>†</sup>  |
| Refractory to both bortezomib and lenalidomide |    |           |                          |
| No                                             | 50 | 35 (70.0) |                          |
| Yes                                            | 32 | 20 (62.5) | p = 0.6305 <sup>†</sup>  |
| Unknown                                        | 22 | 14 (63.6) |                          |
| Best response to prior treatment               |    |           |                          |
| sCR                                            | 10 | 9 (90.0)  |                          |
| CR                                             | 5  | 4 (80.0)  |                          |
| VGPR                                           | 13 | 12 (92.3) |                          |
| PR                                             | 29 | 20 (69.0) | p = 0.0011 <sup>††</sup> |
| SD                                             | 25 | 14 (56.0) |                          |
| PD                                             | 22 | 10 (45.5) |                          |

<sup>†</sup>Fisher's exact test; <sup>††</sup>Cochran-Armitage test

ORR overall response rate, ECOG PS Eastern Cooperative Oncology Group performance

status, *sCR* stringent complete response, *CR* complete response, *VGPR* very good partial response, *PR* partial response, *SD* stable disease, *PD* progressive disease

<sup>a</sup>Best response was analyzed after excluding 10 patients without medical records that contained relevant information

**Supplementary Table 2.** Factors associated with progression-free survival

| Patient characteristics                                        | Total, n <sup>a</sup> | Median PFS (95% CI), months | Hazard ratio (95% CI) | p-value   |
|----------------------------------------------------------------|-----------------------|-----------------------------|-----------------------|-----------|
| <b>Sex</b>                                                     |                       |                             |                       |           |
| Male                                                           | 54                    | 10.5 (6.1, 17.5)            |                       |           |
| Female                                                         | 59                    | 7.0 (4.0, 14.0)             | 1.275 (0.8,2.1)       | p = 0.358 |
| <b>Age</b>                                                     |                       |                             |                       |           |
| < 65                                                           | 30                    | 14.2 (6.0, -)               |                       |           |
| ≥ 65                                                           | 83                    | 8.0 (6.1, 12.0)             | 1.280 (0.7,2.5)       | p = 0.467 |
| < 75                                                           | 84                    | 9.5 (6.1, 14.2)             |                       |           |
| ≥ 75                                                           | 29                    | 9.0 (3.8, 12.0)             | 1.205 (0.7,2.1)       | p = 0.517 |
| <b>ECOG-PS</b>                                                 |                       |                             |                       |           |
| 0–1                                                            | 66                    | 6.8 (5.9, 12.4)             |                       |           |
| 2–4                                                            | 13                    | 12.0 (1.1, -)               | 0.571 (0.2,1.4)       | p = 0.217 |
| <b>Complications</b>                                           |                       |                             |                       |           |
| No                                                             | 58                    | 8.0 (6.1, 16.1)             |                       |           |
| Yes                                                            | 55                    | 9.5 (6.0, 12.0)             | 1.206 (0.7,2.0)       | p = 0.477 |
| <b>Cytogenetics</b>                                            |                       |                             |                       |           |
| <b>del(17p)</b>                                                |                       |                             |                       |           |
| No                                                             | 52                    | 8.0 (5.7, 14.0)             |                       |           |
| Yes                                                            | 13                    | 8.0 (1.6, -)                | 0.918 (0.4,2.1)       | p = 0.842 |
| <b>t(4;14)</b>                                                 |                       |                             |                       |           |
| No                                                             | 49                    | 7.8 (4.8, 11.9)             |                       |           |
| Yes                                                            | 19                    | 12.0 (8.0, -)               | 0.706 (0.3,1.6)       | p = 0.389 |
| <b>t(11;14)</b>                                                |                       |                             |                       |           |
| No                                                             | 27                    | 4.8 (2.1, -)                |                       |           |
| Yes                                                            | 21                    | 14.2 (6.1, 18.2)            | 0.459 (0.2,1.1)       | p = 0.087 |
| <b>t(14;16)</b>                                                |                       |                             |                       |           |
| No                                                             | 56                    | 8.0 (5.1, 11.9)             |                       |           |
| Yes                                                            | 8                     | 7.0 (1.4, -)                | 0.704 (0.2,2.0)       | p = 0.519 |
| <b>High risk [at least one of del(17p), t(4;14), t(14;16)]</b> |                       |                             |                       |           |
| No                                                             | 35                    | 10.5 (4.8, 14.0)            |                       |           |
| Yes                                                            | 34                    | 12.0 (3.1, -)               | 0.806 (0.4,1.6)       | p = 0.525 |
| <b>Number of prior treatments</b>                              |                       |                             |                       |           |
| 1                                                              | 21                    | 19.5 (3.8, -)               | 0.365 (0.1,1.1)       | p = 0.074 |
| 2–3                                                            | 36                    | 11.7 (6.3, 17.5)            |                       |           |

|                                                |     |                  |                 |           |
|------------------------------------------------|-----|------------------|-----------------|-----------|
| $\geq 4$                                       | 56  | 7.0 (5.9, 11.9)  | 1.382 (0.8,2.4) | p = 0.264 |
| Prior bortezomib treatment                     |     |                  |                 |           |
| No                                             | 10  | 18.2 (3.8, -)    |                 |           |
| Yes                                            | 103 | 9.0 (6.1, 12.0)  | 1.513 (0.6,3.8) | p = 0.382 |
| Refractory to bortezomib                       |     |                  |                 |           |
| No                                             | 50  | 11.2 (6.3, 16.1) |                 |           |
| Yes                                            | 50  | 6.8 (4.8, 11.9)  | 1.539 (0.9,2.7) | p = 0.127 |
| Prior lenalidomide treatment                   |     |                  |                 |           |
| No                                             | 13  | 18.6 (2.8, -)    |                 |           |
| Yes                                            | 100 | 9.0 (6.1, 12.0)  | 2.317 (0.9,6.2) | p = 0.095 |
| Refractory to lenalidomide                     |     |                  |                 |           |
| No                                             | 38  | 11.7 (4.0, -)    |                 |           |
| Yes                                            | 58  | 7.8 (6.1, 12.0)  | 1.222 (0.6,2.3) | p = 0.540 |
| Refractory to both bortezomib and lenalidomide |     |                  |                 |           |
| No                                             | 57  | 9.5 (6.1, 12.0)  |                 |           |
| Yes                                            | 34  | 6.8 (3.1, 12.4)  | 1.107 (0.6,2.0) | p = 0.732 |
| Best response to prior treatment               |     |                  |                 |           |
| sCR                                            | 12  | -(1.0, -)        |                 |           |
| CR                                             | 5   | 12.4 (2.8, -)    | 0.903 (0.2,4.9) | p = 0.906 |
| VGPR                                           | 13  | 17.5 (6.8, -)    | 0.574 (0.1,2.3) | p = 0.434 |
| PR                                             | 29  | 7.0 (3.1, 18.2)  | 1.260 (0.4,3.8) | p = 0.683 |
| SD                                             | 28  | 7.8 (5.1, 11.9)  | 1.474 (0.5,4.5) | p = 0.499 |
| PD                                             | 25  | 8.0 (2.0, 12.0)  | 1.716 (0.6,5.1) | p = 0.334 |

A Cox proportional hazards model.

*PFS* progression-free survival, *CI* confidence interval, *ECOG PS* Eastern Cooperative Oncology Group performance status, *Ig* immunoglobulin, *sCR* stringent complete response, *CR* complete response, *VGPR* very good partial response, *PR* partial response, *SD* stable disease, *PD* progressive disease

<sup>a</sup>PFS was analyzed after excluding one patient without medical records that contained relevant information

**Supplementary Table 3.** Factors associated with treatment-emergent adverse events (safety analysis set)

| Patient characteristics           | Total, n | All grade, n (%) | p-value                 | ≥ grade 3, n (%) | p-value                 |
|-----------------------------------|----------|------------------|-------------------------|------------------|-------------------------|
| <b>Sex</b>                        |          |                  |                         |                  |                         |
| Male                              | 58       | 25 (43.1)        | p = 0.587 <sup>†</sup>  | 12 (20.7)        | p = 1.000 <sup>†</sup>  |
| Female                            | 62       | 30 (48.4)        |                         | 13 (21.0)        |                         |
| <b>Age</b>                        |          |                  |                         |                  |                         |
| < 65                              | 33       | 13 (39.4)        | p = 0.418 <sup>†</sup>  | 6 (18.2)         | p = 0.803 <sup>†</sup>  |
| ≥ 65                              | 87       | 42 (48.3)        |                         | 19 (21.8)        |                         |
| < 75                              | 90       | 42 (46.7)        | p = 0.834 <sup>†</sup>  | 21 (23.3)        | p = 0.306 <sup>†</sup>  |
| ≥ 75                              | 30       | 13 (43.3)        |                         | 4 (13.3)         |                         |
| <b>ECOG-PS</b>                    |          |                  |                         |                  |                         |
| 0–1                               | 68       | 27 (39.7)        | p = 0.221 <sup>†</sup>  | 9 (13.2)         | p = 0.208 <sup>†</sup>  |
| 2–4                               | 13       | 8 (61.5)         |                         | 4 (30.8)         |                         |
| Unknown                           | 39       | 20 (51.3)        | /                       | 12 (30.8)        | /                       |
| <b>Complications</b>              |          |                  |                         |                  |                         |
| No                                | 59       | 26 (44.1)        | p = 0.718 <sup>†</sup>  | 9 (15.3)         | p = 0.179 <sup>†</sup>  |
| Yes                               | 61       | 29 (47.5)        |                         | 16 (26.2)        |                         |
| <b>Cardiac complications</b>      |          |                  |                         |                  |                         |
| No                                | 110      | 50 (45.5)        | p = 1.000 <sup>†</sup>  | 23 (20.9)        | p = 1.000 <sup>†</sup>  |
| Yes                               | 10       | 5 (50.0)         |                         | 2 (20.0)         |                         |
| <b>Renal complications</b>        |          |                  |                         |                  |                         |
| No                                | 87       | 42 (48.3)        | p = 0.418 <sup>†</sup>  | 17 (19.5)        | p = 0.618 <sup>†</sup>  |
| Yes                               | 33       | 13 (39.4)        |                         | 8 (24.2)         |                         |
| <b>Pulmonary complications</b>    |          |                  |                         |                  |                         |
| No                                | 113      | 51 (45.1)        | p = 0.701 <sup>†</sup>  | 24 (21.2)        | p = 1.000 <sup>†</sup>  |
| Yes                               | 7        | 4 (57.1)         |                         | 1 (14.3)         |                         |
| <b>Hypertension</b>               |          |                  |                         |                  |                         |
| No                                | 77       | 33 (42.9)        | p = 0.446 <sup>†</sup>  | 15 (19.5)        | p = 0.645 <sup>†</sup>  |
| Yes                               | 43       | 22 (51.2)        |                         | 10 (23.3)        |                         |
| <b>Number of prior treatments</b> |          |                  |                         |                  |                         |
| 1                                 | 21       | 5 (23.8)         | p = 0.469 <sup>††</sup> | 1 (4.8)          | p = 0.554 <sup>††</sup> |
| 2–3                               | 41       | 25 (61.0)        |                         | 13 (31.7)        |                         |
| ≥ 4                               | 58       | 25 (43.1)        |                         | 11 (19.0)        |                         |

<sup>†</sup>Fisher's exact test; <sup>††</sup>Cochran-Armitage test

*ECOG PS* Eastern Cooperative Oncology Group performance status
